1 **Agreement between measurements of stance width using motion capture and center of**  
2 **pressure in individuals with and without Parkinson's disease**

3 J. Lucas McKay, Ph.D., M.S.C.R.

4  
5 The Wallace H. Coulter Department of Biomedical Engineering, Emory University and the  
6 Georgia Institute of Technology

7  
8 Research Article  
9 Submitted to  
10 PLoS ONE

11  
12 *Correspondence to:* J. Lucas McKay, Ph.D., M.S.C.R.  
13 Wallace H. Coulter Department of Biomedical Engineering  
14 Emory University and the Georgia Institute of Technology  
15 Room R154  
16 Emory Rehabilitation Hospital  
17 1441 Clifton Road  
18 Atlanta, Georgia, 30322  
19 USA  
20 [j.lucas.mckay@emory.edu](mailto:j.lucas.mckay@emory.edu)

21  
22 *Word count (Abstract):* 245

23 *Word count (Main text):* 1302

24 *Figures and Tables:* 2

25 *References:* 19

26  
27 *Running title:* Stance width estimation from kinematic and kinetic data

28  
29 *Conflict of interest statement:* The author has no conflicts of interest to declare.

30

31 **Abstract**

32 *Background*

33 Many individuals with Parkinson's disease exhibit narrow stance width during balance and gait. Because  
34 of this, stance width is an important biomechanical variable in many studies. Measuring stance width  
35 accurately using kinematic markers in parkinsonian patients can be problematic due to occlusions by  
36 research staff who must closely guard patients to prevent falls.

37 *Methods*

38 We investigated whether a measure of stance width based on the mediolateral distance between the center  
39 of pressure under each foot could approximate stance width measured with kinematic data. We assessed  
40 the agreement between estimates of stance width obtained from simultaneous kinematic and center of  
41 pressure measures during quiet standing in 15 individuals (n=9 parkinsonian, n=6 age-similar  
42 neurotypical). The source data (1363 unique trials) contained observations of stance width varying  
43 between 75–384 mm ( $\approx$  25-150% of hip width).

44 *Findings*

45 Stance width estimates using the two measures were strongly correlated ( $r = 0.98$ ). Center of pressure  
46 estimates of stance width were 48 mm wider on average than kinematic measures, and did not vary across  
47 study groups ( $F_{2,12}=1.81$ ,  $P<0.21$ ). The expected range of differences between the center of pressure and  
48 kinematic methods was 14–83 mm. Agreement increased as stance width increased ( $P<0.02$ ).

49 *Interpretation*

50 It is appropriate to define stance width based on center of pressure when it is convenient to do so in  
51 studies of individuals with and without Parkinson's disease. When comparing results across studies with  
52 the two methodologies, it is reasonable to assume a bias of 48 mm.

53 **Keywords**

54 Postural control; Center of pressure location; Measurement; Methodology; Foot position

55

## 56 1. Introduction

57 Many individuals with Parkinson's disease (PD) exhibit narrow stance width during balance and gait  
58 (1). Clinically, "narrow stance" is a postural abnormality in which the feet are placed substantially medial  
59 to the anterior superior iliac spines (ASIS) (2). Stance width is therefore an important variable in many  
60 studies of parkinsonian posture and balance (e.g., (3-5)). It is typically treated as a nominal single value or  
61 as a range of values described by the mediolateral distance between kinematic markers placed on the  
62 heels, or between the medial malleoli (3-5).

63 Due to repeated protective steps, dyskinesias, and other practical concerns when studying  
64 parkinsonian balance, it is difficult to control stance width precisely during experiments – and so ideally,  
65 stance width should be measured as a continuous covariate throughout an experiment. However, doing so  
66 with kinematic markers can be problematic due to occlusions by research staff who must carefully guard  
67 patients to prevent falls.

68 Here, we investigated whether a proxy measure of stance width based on the mediolateral distance  
69 between the centers of pressure (CoP) beneath each foot could approximate stance width measured  
70 kinematically. As typically defined (6), the CoP is the point location of the vertical ground reaction force  
71 vector beneath the entire body, and represents a weighted average of all the pressures over the surface  
72 area in contact with the ground (6). Whole-body CoP location is often calculated as an important outcome  
73 variable in clinical balance studies (5, 7, 8). If bilateral force plates are used, CoP can be calculated  
74 separately for each foot (e.g., as it is in instrumented treadmill studies (9)). Since the CoP of each foot  
75 must be located within its boundaries, the mediolateral distance between them must be considerably  
76 associated with the stance width between the heels during bipedal standing.

77 We used the approach suggested by Bland and Altman (10) to assess agreement between stance width  
78 estimated from foot CoP and measured kinematically in neurotypical individuals (NT) and in  
79 parkinsonian individuals in the ON (PD-ON) (8) and OFF (PD-OFF) (11) medication states. We  
80 quantified the bias and expected range of differences associated with using stance width estimates from  
81 foot CoP rather than kinematic measures. Then, we tested whether differences between methods were

82 associated with group membership (NT vs. PD-ON vs. PD-OFF), and whether differences varied with  
83 stance width (12).

84

## 85 **2. Materials and Methods**

### 86 **2.1 PARTICIPANTS**

87 We used baseline measurements from a convenience sample of participants in previous (3) and  
88 ongoing cohort studies investigating the effects of rehabilitation on balance responses (Table 1). PD  
89 participants were mild-moderate with bilateral symptoms (Hoehn and Yahr stage 2-3 (13)). All  
90 participants provided written informed consent and all study procedures were approved by Institutional  
91 Review Boards at the Georgia Institute of Technology and Emory University.

### 92 **2.2 EXPERIMENT**

93 As in previous studies (3, 14), participants stood barefoot on two laboratory-grade force plates  
94 (AMTI-OR6-6-1000, AMTI, Watertown, MA, USA). The force plates were mounted onto a custom  
95 translation platform; however, analyses here considered only periods during which the platform was  
96 stationary. Force and moment data were sampled at 1080 Hz and used to calculate the locations of the  
97 center of pressure beneath each foot using calibration values supplied with the plates (15-17). Kinematic  
98 data were collected at 120 Hz using a Vicon motion capture system (Centennial, CO, USA) and a 25-  
99 marker set including reflective markers placed on the left and right heels. Average foot CoP locations and  
100 heel marker positions were calculated over the first 250 ms of each trial.

101 Stance width was controlled by requesting participants press an object (typically a book) between the  
102 medial surfaces of their feet, which was subsequently removed before data collection ( $\approx 87\%$  of trials), or  
103 by manipulating participant's feet so that kinematic markers on the heels were aligned in the mediolateral  
104 direction with tape marks on the floor ( $\approx 13\%$ ).

## 105 2.3 DATA ANALYSIS

106 Stance width measurements derived from CoP and kinematic data were plotted against each other and  
107 examined visually. After visual assessment of outliers, trials were excluded due to: 1) tension in a ceiling-  
108 mounted fall arrest tether interfering with CoP calculation (17 trials in one participant), and 2) absent  
109 video records preventing trial review (2 trials in one participant). After applying exclusions, 1363 trials  
110 (41 – 161 per participant) were available for analysis. Stance widths were expressed in mm and  
111 normalized to inter-ASIS distance.

112 Following Bland and Altman (10), correlation between the two measurements was assessed with the  
113 Pearson product-moment correlation coefficient  $r$ . Differences between methods were calculated for each  
114 trial and averaged across trials into a single difference value  $d_i$  for each participant. Mean values across  
115 methods were calculated for each trial and averaged into a single mean value  $m_i$  for each participant. Bias  
116 between the two methods was quantified as the mean difference  $\underline{d}$  (CoP – kinematic method) and the  
117 standard deviation of the differences  $s$ . The limits of agreement were calculated as the range  $\underline{d}-2s$  to  $\underline{d}+2s$ .  
118 Variation of differences  $d_i$  across groups was assessed with one-way ANOVA. Associations between  
119 differences  $d_i$  and mean values  $m_i$  were assessed with  $r$  (12). Data processing was performed in Matlab  
120 (r2016b, The Mathworks, Natick, MA, USA). Statistical procedures were performed in SAS Studio (3.5,  
121 The SAS Institute, Cary, NC, USA) and considered significant at  $P = 0.05$ .

## 122 3. Results

123 Stance widths measured from kinematic data varied between 75 – 348 mm, corresponding to 24.9 –  
124 154.1% of inter-ASIS distance. CoP and kinematic stance width measurements are presented in Figure  
125 1A. The two measures were strongly correlated ( $r = 0.98$ ). The mean difference  $\underline{d}$  between methods was  
126 48 mm, and the standard deviation of the differences ( $s$ ) was 17 mm. Differences  $d_i$  did not vary across  
127 groups ( $F_{2,12}=1.81$ ,  $P<0.21$ ). The limits of agreement, defined as the range  $\underline{d}-2s$  to  $\underline{d}+2s$  (10), was 14–83  
128 mm. A “Bland-Altman plot” of the differences between the two methods  $d_i$  against their means  $m_i$  is  
129 presented in Figure 1B.  $d_i$  and  $m_i$  were significantly negatively correlated ( $r = -0.59$ ,  $P<0.02$ ).

#### 130 **4. Discussion**

131 Stance width is an important variable in many studies of parkinsonian (4, 5) and neurotypical (18, 19)  
132 posture and balance. We found that stance width estimates from foot CoP and kinematic markers were  
133 strongly linearly correlated, and that on average, measures of stance width derived from CoP were 48 mm  
134 wider than those derived from kinematic markers. This bias that can be explained by the externally-  
135 rotated “toe out” posture used by most participants, in which a substantial portion of the foot plantar  
136 surface lies lateral to the posterior face of the heel. Overall, these results suggest that foot CoP location, a  
137 commonly calculated variable in clinical biomechanics studies (5, 7, 8) can be used to approximate stance  
138 width in healthy aging and in individuals with PD in the ON and OFF medication states.

139 We noted that differences between methods were non-negligible – ranging from 14 to 83 mm.  
140 However, this precision is adequate to discriminate between nominal stance widths used in the literature,  
141 which are typically separated by 100 mm or more (4, 18). Due to the high precision of CoP calculation  
142 with laboratory force plates (2-5 mm (17)), the primary source of variability in differences is probably  
143 trial-to-trial variability in weight distribution, rather than instrumentation error.

144 There are two notable limitations to this approach. First, differences between methods were highest at  
145 the narrow stance widths preferred by PD subjects, a fact that should be considered carefully during study  
146 design. Second, because these participants were allowed to adopt a comfortable “toe out” orientation  
147 during testing, the agreement between the methods in experimental paradigms in which foot orientation is  
148 enforced (e.g., parallel (4); 20° (18)) remains to be established.

#### 149 **5. Conclusion**

150 In summary, these results suggest that: 1) it is appropriate in studies of individuals with and without  
151 PD to define stance width based on CoP, and 2) when comparing results across studies with the two  
152 methods, it is reasonable to assume a bias of 48 mm.

153

154 **Acknowledgements**

155 I thank Dr. Jessica Allen, Dr. Jeffrey Bingham, Dr. Madeleine Hackney, Dr. Lena Ting, and Ms.  
156 Kimberly Lang for their expertise and assistance.

157

158 **Funding**

159 This work was supported by the National Institutes of Health (<https://www.nih.gov/>) grant numbers  
160 R21 HD075612, K25 HD086276, RR025008, UL1TR000454, KL2TR000455; and the Emory Udall  
161 Center. The funders had no role in study design, data collection and analysis, decision to publish, or  
162 preparation of the manuscript.

163

164 **Competing Interests**

165 The author has declared that no competing interests exist.

166

## 167 References

- 168 1. Park JH, Kang YJ, Horak FB. What Is Wrong with Balance in Parkinson's Disease? *Journal of*  
169 *movement disorders*. 2015;8(3):109-14.
- 170 2. Massano J, Bhatia KP. Clinical approach to Parkinson's disease: features, diagnosis, and  
171 principles of management. *Cold Spring Harbor perspectives in medicine*. 2012;2(6):a008870.
- 172 3. McKay J, Ting L, Hackney M. Balance, Body Motion, and Muscle Activity After High-Volume  
173 Short-Term Dance-Based Rehabilitation in Persons With Parkinson Disease: A Pilot Study. *J Neurol Phys*  
174 *Ther*. 2016;40(4):257-68.
- 175 4. Dimitrova D, Horak FB, Nutt JG. Postural Muscle Responses to Multidirectional Translations in  
176 Patients With Parkinson's Disease. *J Neurophysiol*. 2004;91(1):489-501.
- 177 5. Dimitrova D, Nutt J, Horak FB. Abnormal force patterns for multidirectional postural responses  
178 in patients with Parkinson's disease. *Experimental Brain Research*. 2004;156(2):183-95.
- 179 6. Winter DA. Human balance and posture control during standing and walking. *Gait Posture*.  
180 1995;3(4):193-214.
- 181 7. Bolger D, Ting LH, Sawers A. Individuals with transtibial limb loss use interlimb force  
182 asymmetries to maintain multi-directional reactive balance control. *Clin Biomech*. 2014.
- 183 8. Hass CJ, Waddell DE, Wolf SL, Juncos JL, Gregor RJ. Gait initiation in older adults with  
184 postural instability. *Clin Biomech*. 2008;23(6):743-53.
- 185 9. Owings TM, Grabiner MD. Step width variability, but not step length variability or step time  
186 variability, discriminates gait of healthy young and older adults during treadmill locomotion. *J Biomech*.  
187 2004;37(6):935-8.
- 188 10. Bland JM, Altman DG. Statistical methods for assessing agreement between two methods of  
189 clinical measurement. *Lancet*. 1986;1(8476):307-10.
- 190 11. Marusiak J, Jaskolska A, Koszewicz M, Budrewicz S, Jaskolski A. Myometry revealed  
191 medication-induced decrease in resting skeletal muscle stiffness in Parkinson's disease patients. *Clinical*  
192 *biomechanics*. 2012;27(6):632-5.
- 193 12. Shoukri M, Hashim S. *Analysis of Method Comparison Studies Using SAS*. SAS User's Group  
194 International Proceedings; Seattle, WA, USA2003.
- 195 13. Hoehn MM, Yahr MD. Parkinsonism: onset, progression and mortality. *Neurology*.  
196 1967;17(5):427-42.
- 197 14. Welch TD, Ting LH. Mechanisms of motor adaptation in reactive balance control. *PloS one*.  
198 2014;9(5):e96440.
- 199 15. AMTI Inc. *AMTI Biomechanics Platform Instruction Manual*. Watertown, MA, USA: AMTI  
200 Inc.; 2004.
- 201 16. AMTI Inc. *AMTI Force Platform Calculations*. Watertown, MA, USA: AMTI Inc.; 1991.
- 202 17. Bartlett HL, Ting LH, Bingham JT. Accuracy of force and center of pressure measures of the Wii  
203 Balance Board. *Gait Posture*. 2014;39(1):224-8.
- 204 18. Henry SM, Fung J, Horak FB. Effect of stance width on multidirectional postural responses. *J*  
205 *Neurophysiol*. 2001;85(2):559-70.
- 206 19. Torres-Oviedo G, Ting LH. Subject-Specific Muscle Synergies in Human Balance Control Are  
207 Consistent Across Different Biomechanical Contexts. *J Neurophysiol*. 2010;103(6):3084-98.

208  
209



210 **Figure legends**

211 Figure 1. Comparison of stance width measurements from kinematic and CoP data. A: Plot of results of  
212 one method (CoP, ordinate) against those of the other (kinematics, abscissa). Marker shapes designate  
213 study group and participants are coded by color. B: “Bland-Altman” (10) plot of limits of agreement  
214 between the two methods. The CoP method introduces an absolute bias  $\underline{d}$  of 48 mm and an expected  
215 range of deviations 14-83 mm. Color and marker codes are as in part A.

216

217

218 **Tables**

219 Table 1. Demographic, clinical, and anthropometric features of the study population.

| Participant  | Hoehn & Yahr Stage | Age | Sex | Height, m | Weight, kg | Inter-ASIS distance, cm | Left leg length, cm | Right leg length, cm |
|--------------|--------------------|-----|-----|-----------|------------|-------------------------|---------------------|----------------------|
| Neurotypical |                    |     |     |           |            |                         |                     |                      |
| NT1          | -                  | 54  | F   | 1.62      | 66.7       | 31.3                    | 86.5                | 88.5                 |
| NT2          | -                  | 56  | F   | 1.78      | 74.8       | 24.7                    | 98.0                | 98.0                 |
| NT3          | -                  | 58  | M   | 1.64      | 67.2       | 25.5                    | 82.5                | 82.0                 |
| NT4          | -                  | 64  | M   | 1.80      | 95.2       | 22.0                    | 91.0                | 91.8                 |
| NT5          | -                  | 70  | F   | 1.57      | 51.0       | 22.3                    | 82.0                | 82.0                 |
| NT6          | -                  | 77  | M   | 1.85      | 81.9       | 27.8                    | 106.0               | 105.0                |
| PD-ON        |                    |     |     |           |            |                         |                     |                      |
| PDON1        | 2                  | 68  | M   | 1.80      | 80.9       | 28.5                    | 93.5                | 94.0                 |
| PDON2        | 2                  | 69  | F   | 1.55      | 74.8       | 30.1                    | 84.0                | 83.0                 |
| PDON3        | 3                  | 73  | F   | 1.80      | 62.7       | 21.1                    | 90.0                | 91.0                 |
| PDON4        | 2.5                | 79  | M   | 1.68      | 68.2       | 27.5                    | 91.0                | 90.0                 |
| PDON5        | 3                  | 79  | M   | 1.70      | 74.4       | 24.0                    | 89.5                | 90.0                 |
| PD-OFF       |                    |     |     |           |            |                         |                     |                      |
| PDOFF1       | 3                  | 75  | F   | 1.54      | 50.3       | 22.3                    | 83.0                | 82.0                 |
| PDOFF2       | 2                  | 53  | M   | 1.75      | 86.2       | 25.1                    | 90.4                | 89.7                 |
| PDOFF3       | 2                  | 54  | F   | 1.63      | 66.0       | 26.2                    | 88.0                | 88.0                 |
| PDOFF4       | 3                  | 82  | F   | 1.68      | 59.9       | 25.5                    | 94.8                | 94.1                 |

220 Abbreviations: ASIS, anterior superior iliac spine; PD-ON, PD participants in the ON medication  
 221 state; PD-OFF, PD participants after 12+ hours of withdrawal of antiparkinsonian medications.

### 1A. Comparison of stance width (mm) measured from heel markers and estimated from CoP

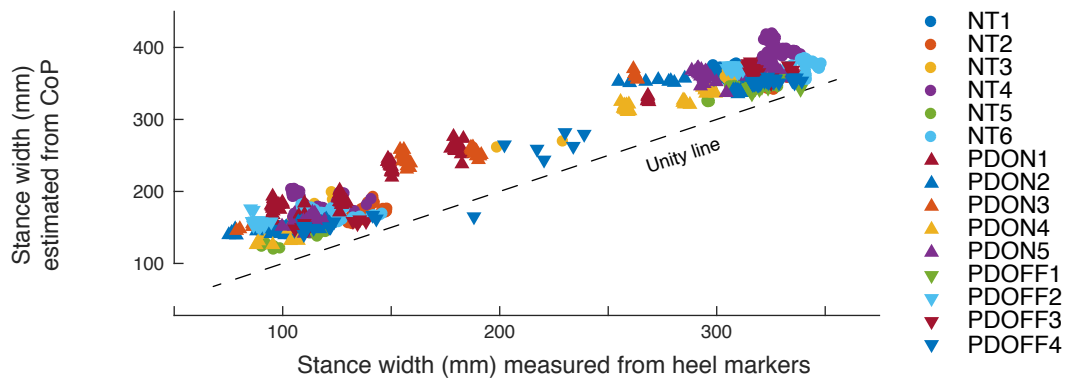

### 1B. Agreement between methods

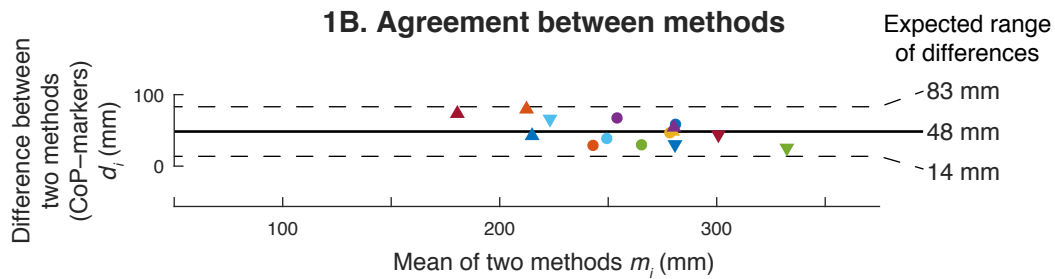

Source: https://www.biorxiv.org/content/10.1101/122523v1.full.pdf
